# Supplementary material
Source: publisher figshare collection journal article supplement (https://sage.figshare.com/ndownloader/files/13013051)
Supplement: Supplementary file 1 [file 13013051]

## User Test Questionnaire

| Section A: Finding and Understanding (Quantitative questions) |                                                                                                                                                                                                                                                                                                                                                                                                                                                      |
|---------------------------------------------------------------|------------------------------------------------------------------------------------------------------------------------------------------------------------------------------------------------------------------------------------------------------------------------------------------------------------------------------------------------------------------------------------------------------------------------------------------------------|
| 1                                                             | What were the two main purposes of the study?                                                                                                                                                                                                                                                                                                                                                                                                        |
|                                                               | <p><b>Section:</b> Why was this study done?</p> <p><b>Indicative answer</b> - NEED BOTH:</p> <ul style="list-style-type: none"> <li>i. to look at daytime nose symptoms [<i>Round 2 only</i>] / to see how well Medicine A could improve symptoms of seasonal allergies (compared to a sugar pill / placebo)</li> <li>ii. to look at safety [<i>Round 2 only</i>] / to look at how safe this drug was (when taken for seasonal allergies)</li> </ul> |
| 2                                                             | In Part 2 of the study, what medicine did patients take in each of the three groups?                                                                                                                                                                                                                                                                                                                                                                 |
|                                                               | <p><b>Section:</b> How was this study done? / What treatments did patients receive?</p> <p><b>Indicative answer</b> - NEED ALL:</p> <ul style="list-style-type: none"> <li>i. Medicine A</li> <li>ii. Medicine B</li> <li>iii. placebo</li> </ul>                                                                                                                                                                                                    |
| 3                                                             | <p><b>Show card:</b> placebo</p> <p>What is a 'placebo'?</p>                                                                                                                                                                                                                                                                                                                                                                                         |
|                                                               | <p><b>Section:</b> Why was this study done? / How was this study done? / What treatments did patients receive?</p> <p><b>Indicative answer</b> - EITHER:</p> <ul style="list-style-type: none"> <li>i. a sugar pill</li> <li>ii. doesn't contain any drug</li> </ul>                                                                                                                                                                                 |
| 4                                                             | How many people took part in the study?                                                                                                                                                                                                                                                                                                                                                                                                              |
|                                                               | <p><b>Section:</b> Who took part in this study?</p> <p><b>Indicative answer:</b> 1,214 (men and women)</p>                                                                                                                                                                                                                                                                                                                                           |
| 5                                                             | What were the four main daytime nose symptoms that were measured in the study?                                                                                                                                                                                                                                                                                                                                                                       |
|                                                               | <p><b>Section:</b> Why was this study done? / What were the results of the study?</p> <p><b>Indicative answer:</b> NEED ALL:</p> <ul style="list-style-type: none"> <li>i. stuffy nose</li> <li>ii. runny nose</li> <li>iii. itchy nose</li> <li>iv. sneezing</li> </ul>                                                                                                                                                                             |

## Appendix B

|           |                                                                                                                                                                                                                                                                                                                 |
|-----------|-----------------------------------------------------------------------------------------------------------------------------------------------------------------------------------------------------------------------------------------------------------------------------------------------------------------|
| <b>6a</b> | Some people in each group had side effects. In the Medicine A Group, what percentage of people had side effects?                                                                                                                                                                                                |
|           | <b>Section:</b> What side effects did patients have?<br><b>Indicative answer:</b> 17%                                                                                                                                                                                                                           |
| <b>6b</b> | In the Medicine B Group, what percentage of people had side effects?                                                                                                                                                                                                                                            |
|           | <b>Section:</b> What side effects did patients have?<br><b>Indicative answer:</b> 15%                                                                                                                                                                                                                           |
| <b>6c</b> | In the Placebo Group, what percentage of people had side effects?                                                                                                                                                                                                                                               |
|           | <b>Section:</b> What side effects did patients have?<br><b>Indicative answer:</b> 16%                                                                                                                                                                                                                           |
| <b>7</b>  | How did the change in daytime nose symptoms compare in the three groups after two weeks?                                                                                                                                                                                                                        |
|           | <b>Section:</b> What were the results of the study?<br><b>Indicative answer - NEED ALL:</b><br><ul style="list-style-type: none"> <li>i. the Medicine A Group AND the Medicine B Group</li> <li>ii. had more improvement (in daytime nose symptoms)</li> <li>iii. than patients in the Placebo Group</li> </ul> |
| <b>8</b>  | To take part in the study, how long must people have had seasonal allergies for?                                                                                                                                                                                                                                |
|           | <b>Section:</b> Who took part in this study?<br><b>Indicative answer:</b> 2 years (or more)                                                                                                                                                                                                                     |
| <b>9</b>  | Please can you name the company that did this study?                                                                                                                                                                                                                                                            |
|           | <b>Section:</b> Who did the study and how can I contact them?<br><b>Indicative answer:</b> Smith & Jones Company                                                                                                                                                                                                |
| <b>10</b> | What was the most common side effect in this study?                                                                                                                                                                                                                                                             |
|           | <b>Section:</b> What side effects did patients have?<br><b>Indicative answer:</b> headache                                                                                                                                                                                                                      |
| <b>11</b> | <b>[Intro]</b> For this question, I'd like you to think about the patients who had Medicine A and Medicine B.<br>After the study, how did they feel overall about their seasonal allergies?                                                                                                                     |
|           | <b>Section:</b> What were the results of the study?<br><b>Indicative answer:</b> patients felt better (overall about their seasonal allergies)                                                                                                                                                                  |

## Appendix B

|                                                                                                                                                                                                                                                                                                                                                                                                                                                                                                                                                                                                                                                                                                                                                                                                                                                                                                                                                                                                                                                                                                                                                                                                                                                                                                                                                                                                                                                                                                                                                                                                                                                                                                                                                                                                                                                                                                                                                                                                                                                                                                                                                                                                                                                                                                                                                                                                                                                                                                                                                                                                                                                                                                                                                            |                                                                                                                                                                                                                              |
|------------------------------------------------------------------------------------------------------------------------------------------------------------------------------------------------------------------------------------------------------------------------------------------------------------------------------------------------------------------------------------------------------------------------------------------------------------------------------------------------------------------------------------------------------------------------------------------------------------------------------------------------------------------------------------------------------------------------------------------------------------------------------------------------------------------------------------------------------------------------------------------------------------------------------------------------------------------------------------------------------------------------------------------------------------------------------------------------------------------------------------------------------------------------------------------------------------------------------------------------------------------------------------------------------------------------------------------------------------------------------------------------------------------------------------------------------------------------------------------------------------------------------------------------------------------------------------------------------------------------------------------------------------------------------------------------------------------------------------------------------------------------------------------------------------------------------------------------------------------------------------------------------------------------------------------------------------------------------------------------------------------------------------------------------------------------------------------------------------------------------------------------------------------------------------------------------------------------------------------------------------------------------------------------------------------------------------------------------------------------------------------------------------------------------------------------------------------------------------------------------------------------------------------------------------------------------------------------------------------------------------------------------------------------------------------------------------------------------------------------------------|------------------------------------------------------------------------------------------------------------------------------------------------------------------------------------------------------------------------------|
| 12                                                                                                                                                                                                                                                                                                                                                                                                                                                                                                                                                                                                                                                                                                                                                                                                                                                                                                                                                                                                                                                                                                                                                                                                                                                                                                                                                                                                                                                                                                                                                                                                                                                                                                                                                                                                                                                                                                                                                                                                                                                                                                                                                                                                                                                                                                                                                                                                                                                                                                                                                                                                                                                                                                                                                         | How did the researchers find out about the patients' symptoms while they were in the study?                                                                                                                                  |
|                                                                                                                                                                                                                                                                                                                                                                                                                                                                                                                                                                                                                                                                                                                                                                                                                                                                                                                                                                                                                                                                                                                                                                                                                                                                                                                                                                                                                                                                                                                                                                                                                                                                                                                                                                                                                                                                                                                                                                                                                                                                                                                                                                                                                                                                                                                                                                                                                                                                                                                                                                                                                                                                                                                                                            | <p><b>Section:</b> How was this study done?</p> <p><b>Indicative answer:</b> NEED BOTH:</p> <ul style="list-style-type: none"> <li>i. patients used a diary</li> <li>ii. to answer questions about their symptoms</li> </ul> |
| <b>Section B: Qualitative Feedback</b>                                                                                                                                                                                                                                                                                                                                                                                                                                                                                                                                                                                                                                                                                                                                                                                                                                                                                                                                                                                                                                                                                                                                                                                                                                                                                                                                                                                                                                                                                                                                                                                                                                                                                                                                                                                                                                                                                                                                                                                                                                                                                                                                                                                                                                                                                                                                                                                                                                                                                                                                                                                                                                                                                                                     |                                                                                                                                                                                                                              |
| <ol style="list-style-type: none"> <li>1. What are your general impressions of the document?<br/>If not already stated, probe with the following questions to get more feedback on content, wording, layout and design: <ul style="list-style-type: none"> <li>- What are your thoughts on the words used and what they mean?</li> <li>- What are your thoughts on the way the information is laid out on the page?</li> </ul> </li> <li>2. <b>[Show difficulty scale]</b><br/>Using this scale, how easy or difficult was it to find the information when I asked you to?<br/><b>Very easy - Easy - Neither easy nor difficult - Difficult - Very difficult</b><br/>If not already stated, ask participant 'why?'</li> <li>3. <b>[Show difficulty scale]</b><br/>Using this scale, how easy or difficult was it to understand the information?<br/><b>Very easy - Easy - Neither easy nor difficult - Difficult - Very difficult</b><br/>If not already stated, ask participant 'why?'</li> <li>4. Who do you think this summary has been written for? <ul style="list-style-type: none"> <li>- How clearly was this described in the document?</li> </ul> </li> <li>5. Why do you think this summary has been written? <ul style="list-style-type: none"> <li>- How clearly was this described in the document?</li> </ul> </li> <li>6. How useful do you think the information in the summary would be to members of the public?<br/>If not already stated, probe with the following questions: <ul style="list-style-type: none"> <li>- Do you think that people who were not patients would find it useful or not?</li> <li>- Do you think you would find it useful if you were thinking of taking the study medicines?</li> </ul> </li> <li>7. This summary tells you about the results from one study - other studies may show different results. <ul style="list-style-type: none"> <li>- How clearly was this described in the document?</li> </ul> </li> <li>8. Thinking about the whole document, was there any information that you didn't understand or parts that you found more difficult to understand? <ul style="list-style-type: none"> <li>- <b>[Interviewer:</b> For any NU / NF scores, use this opportunity to explain the answer to the participant and get their feedback]</li> </ul> </li> <li>9. Looking at the chart showing you the results <b>[interviewer to point this out]:</b> <ul style="list-style-type: none"> <li>- What were your views on the chart?</li> <li>- What do you think it is telling you?</li> <li>- <b>[Round 2 only]</b> I'd like you to look at a few different versions of the chart <b>[show participant alternative charts]</b>. Can you tell me which you prefer and why?</li> </ul> </li> </ol> |                                                                                                                                                                                                                              |

## Appendix B

**10.** Looking at the table about headache side effects **[interviewer to point this out]:**

- What were your views on the table?
- What do you think it is telling you?

**11.** This is what the document looks like printed **[show participant printed copy].**

- In which format would you prefer to read it and why?
- Would you print the document if you were going to read it at home?

**12. [For higher education sub-group only]** What is your view on the reading level of the document - did it seem appropriate to you?

**13. [Round 2 only]** This is another version of the document **[show participant Version B]**. It is exactly the same as the first one you looked at but the main sections are numbered one to ten.

- Can you tell me whether you prefer the headings with or without numbers and why?

**14.** Finally, do you have any other comments?
